# Supplementary material for: Common Laboratory Mice Are Susceptible to Infection with the SARS-CoV-2 Beta Variant
Source: MDPI journal article supplement (doi:10.3390/v13112263), 2021-11-11
Supplement: s1 [file s1]

**Table S1.** SARS-CoV-2 nucleoprotein and RNA expression in mice infected with the beta variant with different infectious doses at 2, 3 or 4 days post infection. **Legend:** Ag – antigen; BG – Bowman’s glands; BLN – bronchial lymph node; DC – dendritic cells; EC – epithelial cells; NB – nerve bundles; NE – not examined; neg – negative; OEC – olfactory epithelial cells; pos – positive; REC – respiratory epithelial cells; RdRp PCR:  $Ct_{RdRp}-Ct_{actin} \leq 3 = ++, > 3 = +$ , no Ct = -; subE PCR:  $Ct_{subE}-Ct_{actin} \leq 4.5 = ++, > 4.5 = +$ , no Ct = -; E PCR:  $Ct_E-Ct_{actin} \leq -1 = ++, -1 \leq 10 = +, > 10 = -$ .

| Dose<br>[Animal no]            | DPI | Viral Ag                                                                                                                                                                                                                                                                                                                              | Viral RNA in lung (RT-qPCR) |      |    |
|--------------------------------|-----|---------------------------------------------------------------------------------------------------------------------------------------------------------------------------------------------------------------------------------------------------------------------------------------------------------------------------------------|-----------------------------|------|----|
|                                |     |                                                                                                                                                                                                                                                                                                                                       | RdRp                        | subE | E  |
| 2 x 10 <sup>5</sup> PFU<br>[1] | 2   | Nose: individual pos REC/OEC, patches of pos REC/OEC; pos EC in BG<br>Brain: neg (incl olfactory bulb)<br>Trachea: several individual pos EC                                                                                                                                                                                          |                             |      |    |
|                                |     | Lung: bronchus, bronchioles: individual and patches of pos EC, viral Ag covering luminal surface; some adjacent small patches of alveoli with pos type I and II pneumocytes<br>BLN: several pos macrophages/DC                                                                                                                        | ++                          | +    | +  |
| 2 x 10 <sup>5</sup> PFU<br>[2] | 2   | Nose: individual pos REC/OEC, patches of pos REC<br>Brain: neg (incl olfactory bulb)<br>Trachea: NE                                                                                                                                                                                                                                   |                             |      |    |
|                                |     | Lung: several bronchioles with individual to abundant pos EC, viral Ag covering luminal surface; some individual adjacent pos type I and II pneumocytes<br>BLN: NE                                                                                                                                                                    | +                           | +    | +  |
| 2 x 10 <sup>5</sup> PFU<br>[3] | 2   | Nose: some individual pos REC/OEC, patches of pos REC<br>Brain: neg (incl olfactory bulb)<br>Trachea: several individual pos EC                                                                                                                                                                                                       |                             |      |    |
|                                |     | Lung: bronchioles with several individual and patches of pos EC; viral Ag covering luminal surface; areas with degenerate EC and leukocyte infiltration with viral Ag also in infiltrating macrophages; patches of alveoli with pos type I and II pneumocytes<br>BLN: neg                                                             | ++                          | +    | +  |
| 2 x 10 <sup>5</sup> PFU<br>[4] | 2   | Nose: some individual pos REC/OEC, patches of pos REC<br>Brain: neg (incl olfactory bulb)<br>Trachea: NE                                                                                                                                                                                                                              |                             |      |    |
|                                |     | Lung: bronchioles with several individual and patches of pos EC and some degenerate pos cells in lumen; viral Ag covering luminal surface; areas with degenerate EC and leukocyte infiltration with viral Ag also in infiltrating macrophages; patches of alveoli with pos type I and II pneumocytes<br>BLN: a few pos macrophages/DC | ++                          | +    | +  |
| 2 x 10 <sup>5</sup> PFU<br>[5] | 2   | Nose: some individual pos REC/OEC, large stretch of pos REC<br>Brain: neg (incl olfactory bulb)<br>Trachea: a few pos EC                                                                                                                                                                                                              |                             |      |    |
|                                |     | Lung: most bronchioles with several individual and patches of pos EC; viral Ag covering luminal surface; areas with degenerate EC and leukocyte infiltration with viral Ag also in infiltrating macrophages; patches of alveoli with pos type I and II pneumocytes<br>BLN: several pos macrophages/DC                                 | ++                          | ++   | +  |
| 2 x 10 <sup>5</sup> PFU<br>[1] | 3   | Nose: large patches of pos REC/OEC<br>Brain: neg (incl olfactory bulb)<br>Trachea: rare individual pos EC                                                                                                                                                                                                                             |                             |      |    |
|                                |     | Lung: bronchus and bronchioles with individual and patches of pos EC; abundant viral Ag covering luminal surface; adjacent several patches of alveoli with pos type I and II pneumocytes, sloughed off pos alveolar                                                                                                                   | ++                          | ++   | ++ |

|                            |   |                                                                                                                                                                                                                                                                                                                                                                                                                                                                                                                                                      |    |    |    |
|----------------------------|---|------------------------------------------------------------------------------------------------------------------------------------------------------------------------------------------------------------------------------------------------------------------------------------------------------------------------------------------------------------------------------------------------------------------------------------------------------------------------------------------------------------------------------------------------------|----|----|----|
|                            |   | macrophages/type II pneumocytes, and cell free viral Ag in alveolar lumen<br><b>BLN:</b> numerous pos macrophages/DC                                                                                                                                                                                                                                                                                                                                                                                                                                 |    |    |    |
| $2 \times 10^5$ PFU<br>[2] | 3 | <b>Nose:</b> patches of pos REC; large area of pos OEC; some pos cells in BG and NB layer<br><b>Brain:</b> neg (incl olfactory bulb)<br><b>Trachea:</b> rare individual pos EC<br><b>Lung:</b> bronchus and bronchioles with individual and patches of pos EC; abundant viral Ag covering luminal surface; rare small patches of alveoli with pos type I and II pneumocytes, sloughed off pos alveolar macrophages/type II pneumocytes, and cell free viral Ag in alveolar lumen<br><b>BLN:</b> several pos macrophages/DC                           | +  | -  | +  |
| $2 \times 10^5$ PFU<br>[3] | 3 | <b>Nose:</b> large patches of pos REC<br><b>Brain:</b> neg (incl olfactory bulb)<br><b>Trachea:</b> rare individual pos EC<br><b>Lung:</b> bronchus with rare pos EC, bronchioles often with abundant viral Ag covering luminal surface; adjacent a few patches of alveoli with pos type I and II pneumocytes, sloughed off pos alveolar macrophages/type II pneumocytes, and cell free viral Ag in alveolar lumen<br><b>BLN:</b> numerous pos macrophages/DC                                                                                        | +  | -  | ++ |
| $2 \times 10^5$ PFU<br>[4] | 3 | <b>Nose:</b> large patches of pos REC<br><b>Brain:</b> neg (incl olfactory bulb)<br><b>Trachea:</b> a few individual pos EC<br><b>Lung:</b> bronchus and some bronchioles with few individual and patches of pos EC; abundant viral Ag covering luminal surface; adjacent large patch of alveoli with pos type I and II pneumocytes, sloughed off pos alveolar macrophages/type II pneumocytes, and cell free viral Ag in alveolar lumen<br><b>BLN:</b> several pos macrophages/DC                                                                   | +  | -  | ++ |
| $2 \times 10^5$ PFU<br>[5] | 3 | <b>Nose:</b> a few individual pos REC; a few patches of pos REC<br><b>Brain:</b> neg (incl olfactory bulb)<br><b>Trachea:</b> rare individual pos EC<br><b>Lung:</b> bronchus and bronchioles with individual and patches of pos EC; abundant viral Ag covering luminal surface; adjacent several patches of alveoli with pos type I and II pneumocytes, sloughed off pos alveolar macrophages/type II pneumocytes, and cell free viral Ag in alveolar lumen<br><b>BLN:</b> numerous pos macrophages/DC                                              | ++ | ++ | -  |
| $2 \times 10^5$ PFU<br>[6] | 3 | <b>Nose:</b> patches of pos REC; large area of pos OEC; some pos cells in BG and NB layer and olfactory nerves<br><b>Brain:</b> neg (incl olfactory bulb)<br><b>Trachea:</b> rare individual pos EC, a few pos degenerate cells in lumen<br><b>Lung:</b> bronchus with rare pos EC, abundant viral Ag covering luminal surface; adjacent a few patches of alveoli with pos type I and II pneumocytes, sloughed off pos alveolar macrophages/type II pneumocytes, and cell free viral Ag in alveolar lumen<br><b>BLN:</b> numerous pos macrophages/DC | +  | ++ | +  |
| $6 \times 10^4$ PFU<br>[1] | 2 | <b>Nose:</b> several patches of and individual pos REC and OEC; some viral Ag attached to epithelial surface<br><b>Olfactory bulb:</b> neg<br><b>Trachea:</b> patches of pos EC<br><b>Lung:</b> abundant viral Ag deposition covering luminal surface of several bronchioles                                                                                                                                                                                                                                                                         | -  | -  | -  |

|                                      |          |                                                                                                                                                                                                                                                             |    |   |    |
|--------------------------------------|----------|-------------------------------------------------------------------------------------------------------------------------------------------------------------------------------------------------------------------------------------------------------------|----|---|----|
| <b>6 x 10<sup>4</sup> PFU</b><br>[2] | <b>2</b> | <b>Nose:</b> some patches of and several individual pos REC<br><b>Olfactory bulb:</b> neg<br><b>Trachea:</b> one patch of pos EC<br><b>Lung:</b> neg                                                                                                        | -  | - | -  |
| <b>6 x 10<sup>4</sup> PFU</b><br>[3] | <b>2</b> | <b>Nose:</b> abundant patches of and individual pos REC; some cell free viral Ag in mucus<br><b>Olfactory bulb:</b> neg<br><b>Trachea:</b> neg<br><b>Lung:</b> neg                                                                                          | -  | - | -  |
| <b>6 x 10<sup>4</sup> PFU</b><br>[4] | <b>2</b> | <b>Nose:</b> abundant patches of and individual pos REC, occasional pos OEC; cell free viral Ag in mucus<br><b>Trachea:</b> neg<br><b>Lung:</b> neg                                                                                                         | -  | - | -  |
|                                      |          |                                                                                                                                                                                                                                                             |    |   |    |
| <b>6 x 10<sup>4</sup> PFU</b><br>[1] | <b>4</b> | <b>Nose:</b> individual and groups of pos REC and OEC; some cell free viral Ag in mucus<br><b>Olfactory bulb:</b> neg<br><b>Trachea:</b> neg<br><b>Lung:</b> neg                                                                                            | -  | - | -  |
| <b>6 x 10<sup>4</sup> PFU</b><br>[2] | <b>4</b> | <b>Nose:</b> individual and groups of pos REC, a few pos OEC<br><b>Lung:</b> one bronchiole and one bronchio-alveolar transition with a few pos EC<br><b>BLN:</b> several pos macrophages/DC                                                                | -  | - | -  |
| <b>6 x 10<sup>4</sup> PFU</b><br>[3] | <b>4</b> | <b>Nose:</b> numerous pos OEC; cell free viral Ag in mucus<br><b>Olfactory bulb:</b> neg<br><b>Lung:</b> one pos EC in one bronchiole<br><b>BLN:</b> several pos macrophages/DC                                                                             | -  | - | -  |
|                                      |          |                                                                                                                                                                                                                                                             |    |   |    |
| <b>6 x 10<sup>3</sup> PFU</b><br>[1] | <b>2</b> | <b>Nose:</b> several patches of and individual pos REC; some cell free viral Ag in mucus<br><b>Olfactory bulb:</b> neg<br><b>Trachea:</b> neg<br><b>Lung:</b> neg                                                                                           | -  | - | -  |
| <b>6 x 10<sup>3</sup> PFU</b><br>[2] | <b>2</b> | <b>Nose:</b> several patches of and individual pos REC and OEC; cell free viral Ag in mucus<br><b>Olfactory bulb:</b> neg<br><b>Trachea:</b> several patches of pos EC<br><b>Lungs:</b> viral Ag covering luminal surface of bronchioles<br><b>BLN:</b> neg | -  | - | -  |
| <b>6 x 10<sup>3</sup> PFU</b><br>[3] | <b>2</b> | <b>Nose:</b> abundant patches of and individual pos REC; some cell free viral Ag in mucus<br><b>Olfactory bulb:</b> neg<br><b>Trachea:</b> neg<br><b>Lung:</b> neg                                                                                          | +  | + | +  |
| <b>6 x 10<sup>3</sup> PFU</b><br>[4] | <b>2</b> | <b>Nose:</b> large patches of and individual pos REC; some cell free viral Ag in mucus<br><b>Olfactory bulb:</b> neg<br><b>Trachea:</b> neg<br><b>Lung:</b> neg                                                                                             | ++ | + | ++ |
